# Supplementary material
Source: publisher figshare collection journal article supplement (https://acs.figshare.com/ndownloader/files/4274706)
Supplement: Supplementary file 1 [file 4274706]

# Mapping Hot-Spots in Hexagonal Arrays of Metallic Nanotriangles with Azobenzene Polymer Thin Films

*Betty C. Galarreta, Ian Rupar, Amanda Young, François Lagugné-Labarthe\**

Department of Chemistry, University of Western Ontario, 1151 Richmond Street, London, On,

Canada, N6A5B7

\*Author to whom correspondence should be addressed. E-mail: [flagugne@uwo.ca](mailto:flagugne@uwo.ca)

**Supporting informations**

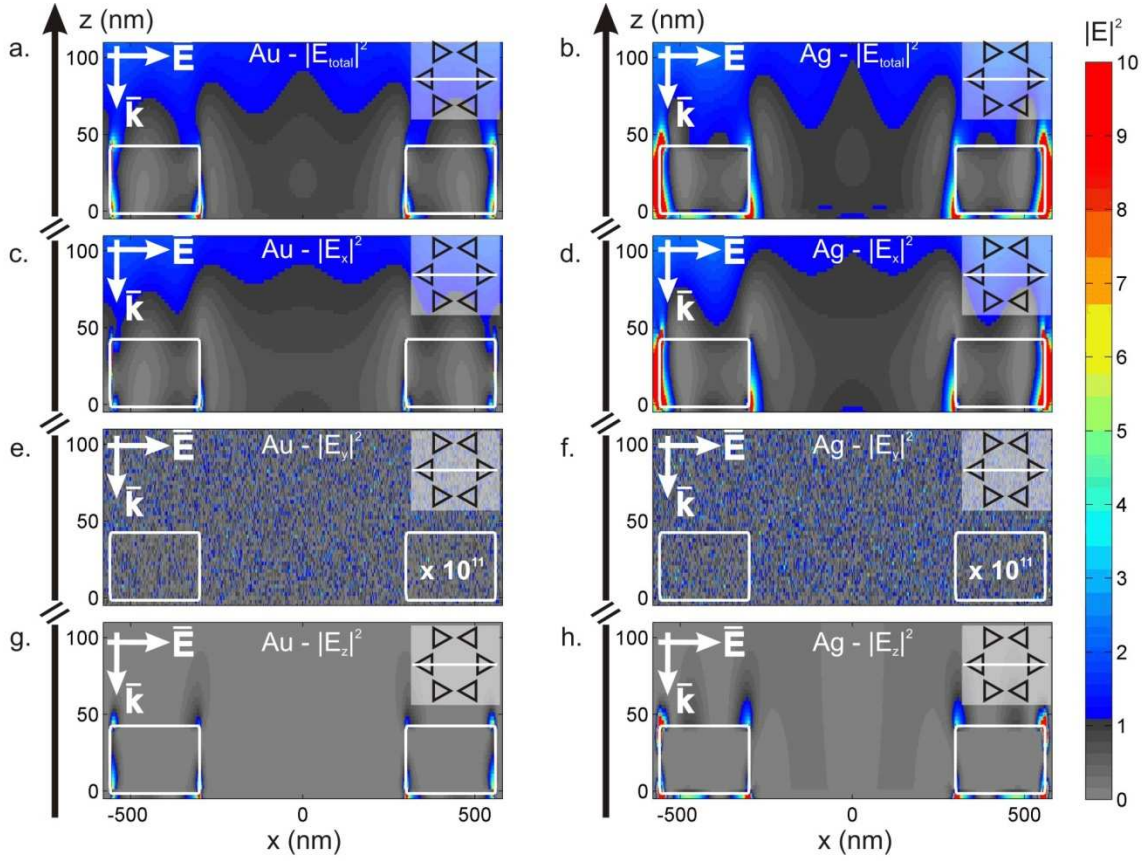

**Figure S11:** Calculated electric field distribution cross section along the center of the lattice (inset) for gold (a) and for silver (b) hexagonal array of nanotriangles with a input linear polarization direction polarized along X direction. Calculated  $|E_x|^2$  field distribution along the center of the lattice unit for gold (c) and silver (d). Calculated  $|E_y|^2$  field distribution along the center of the lattice unit for gold (e) and silver (f). The  $|E_y|^2$  component was multiplied by a factor of  $10^{11}$ . Calculated  $|E_z|^2$  field distribution along the center of the lattice unit for gold (g) and silver (h).
